# Supplementary material for: Non-covalent assembly of a super-tough, highly stretchable and environmentally adaptable self-healing material inspired by nacre
Source: Royal Society of Chemistry journal article supplement (doi:10.1039/d1ta05483j), 2021-01-01
Supplement: d1ta05483j1.pdf [file d1ta05483j1.pdf]

## Supporting Information

# Non-covalent Assembly Super-tough, Highly Stretchable and Environmentally Adaptable Self-healing Material Inspired by Nacre

*Xiaobo Zhu<sup>1,2,3</sup>, Wenru Zheng<sup>1</sup>, Haichao Zhao<sup>1,\*</sup> and Liping Wang<sup>1,\*\*</sup>*

<sup>1</sup>Key Laboratory of Marine Materials and Related Technologies, Zhejiang Key Laboratory of Marine Materials and Protective Technologies, Ningbo Institute of Materials Technology and Engineering, Chinese Academy of Sciences, Ningbo 315201, China

<sup>2</sup>University of Chinese Academy of Sciences, Beijing 100049, China

<sup>3</sup>Innovation Academy of South China Sea Ecology and Environmental Engineering, Chinese Academy of Sciences, Guangzhou 510301, China

Corresponding authors.

\*E-mail: [zhaohaichao@nimte.ac.cn](mailto:zhaohaichao@nimte.ac.cn) (H. Zhao); [wangliping@nimte.ac.cn](mailto:wangliping@nimte.ac.cn) (L. Wang).

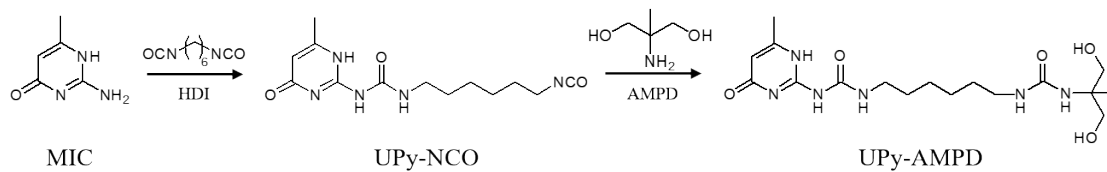

**Fig. S1** Synthetic route of UPy-AMPD.

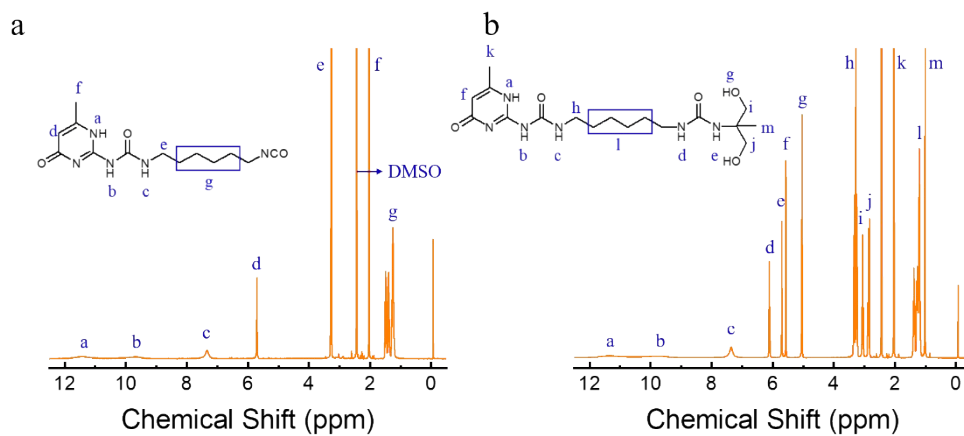

**Fig. S2**  $^1\text{H}$  NMR spectra (DMSO- $d_6$ ) of (a) UPy-NCO and (b) UPy-AMPD.

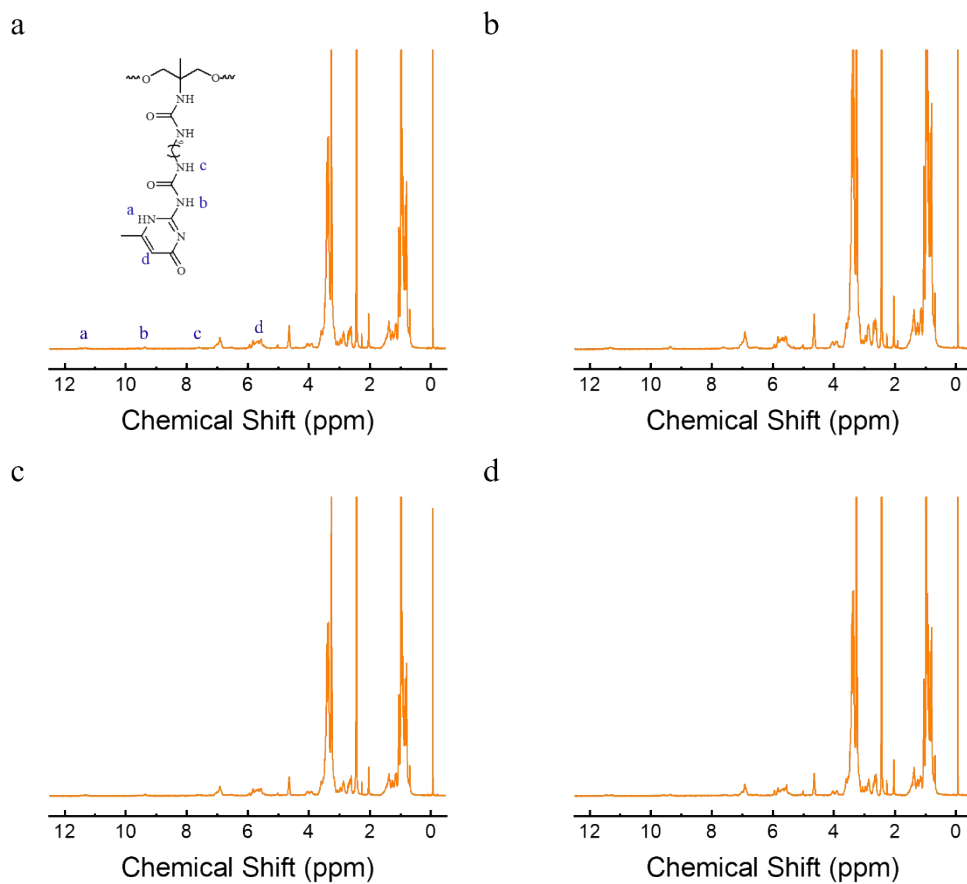

**Fig. S3**  $^1\text{H}$  NMR spectra (DMSO- $d_6$ ) of (a) PU-UPy-AMPD, (b) PU-PDG-0.2%, (c) PU-PDG-0.5%, and (d) PU-PDG-1.0%.

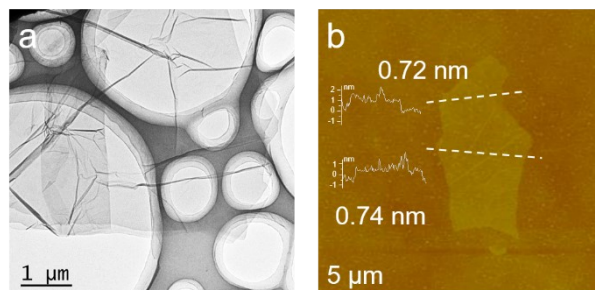

**Fig. S4** (a) TEM and (b) SPM images of GO nanosheets.

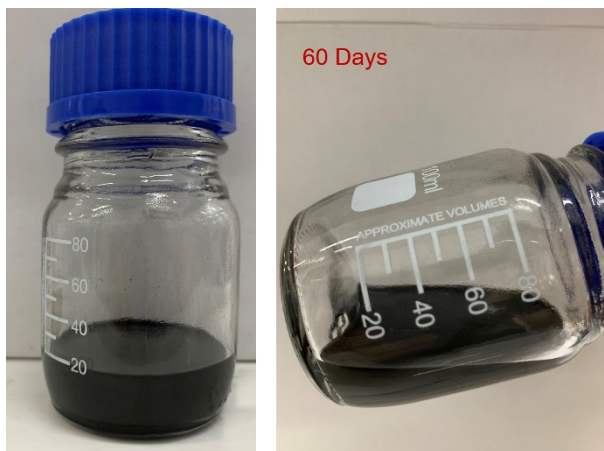

**Fig. S5** Optical picture of the dispersibility of PDG nanosheets in water.

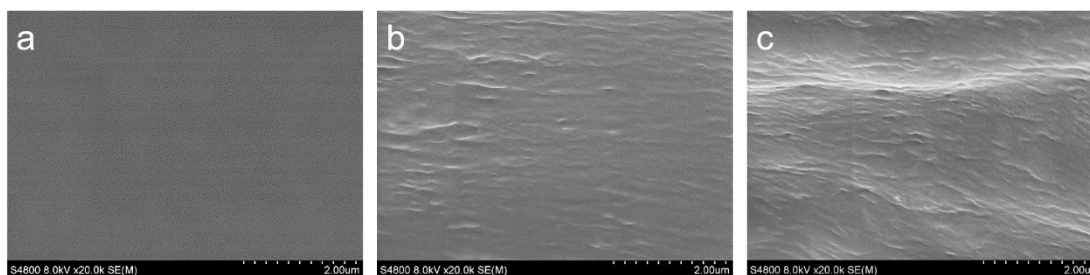

**Fig. S6** Cross-sectional SEM images of (a) PU-UPy-AMPD, (b) PU-PDG-0.2%, and (c) PU-PDG-1.0%.

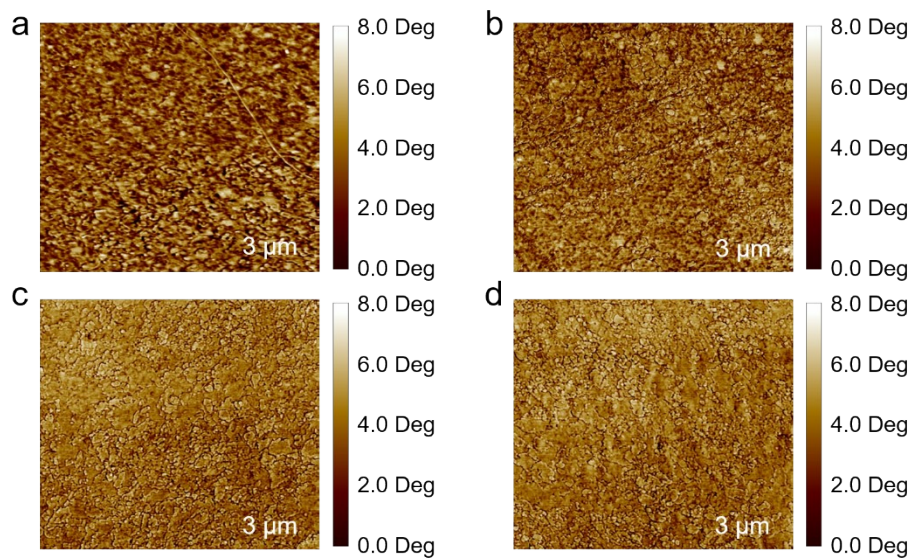

**Fig. S7** SPM images of (a) PU-UPy-AMPD, (b) PU-PDG-0.2%, (c) PU-PDG-0.5%, and (d) PU-PDG-1.0%.

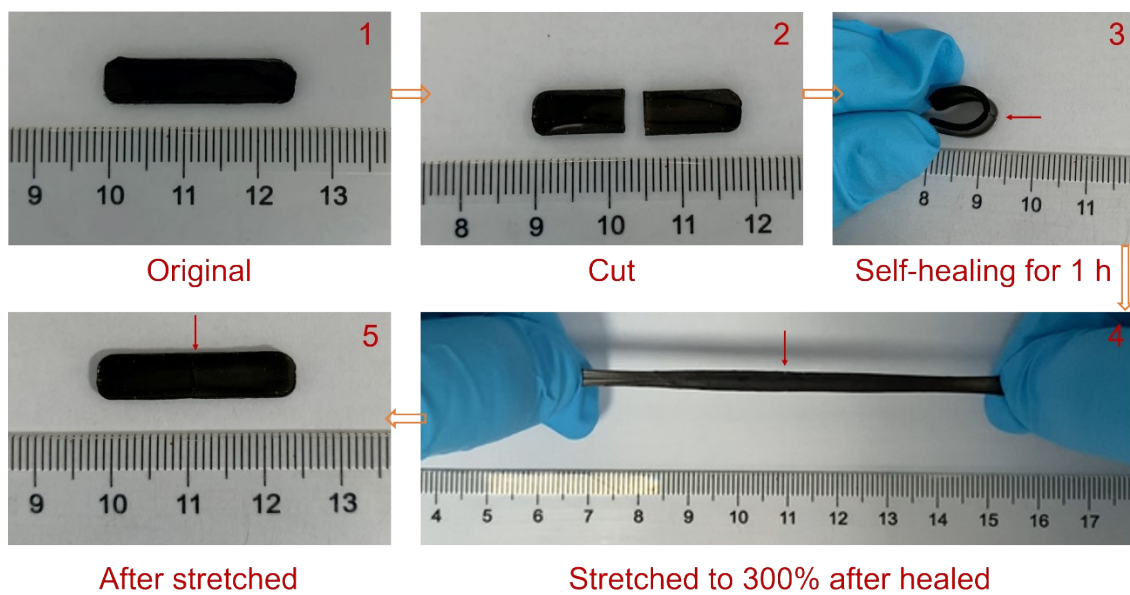

**Fig. S8** Optical photo of PU-PDG-0.5% stretching process after healed at room temperature for 1 hour.

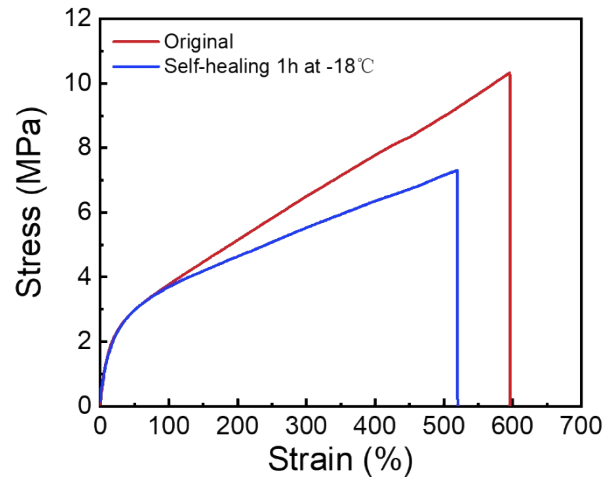

**Fig. S9** Stress-strain curve of PU-PDG-0.5% after self-healing at -18 °C for 1 h.

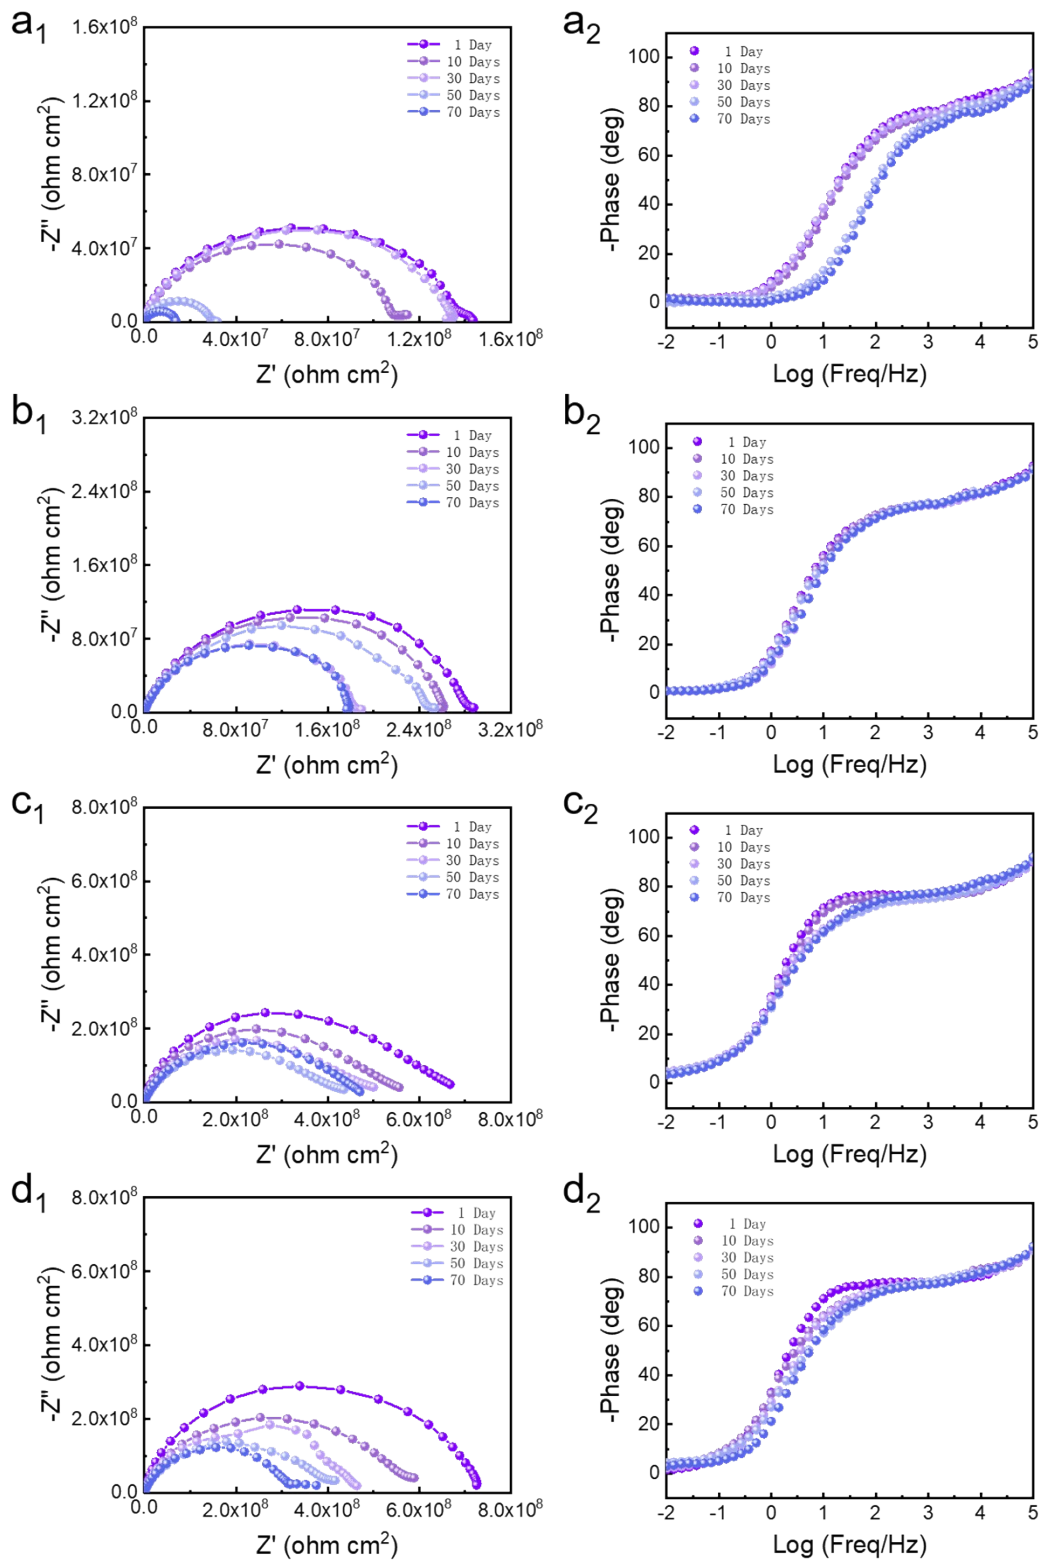

**Fig. S10** Nyquist and Bode-Phase plots of (a) PU-UPy-AMPD, (b) PU-PDG-0.2%, (c) PU-PDG-0.5%, and (d) PU-PDG-1.0%.

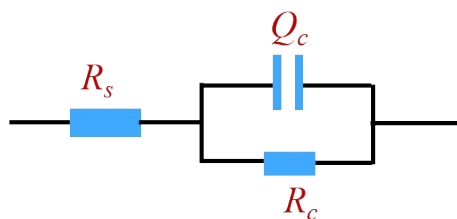

**Fig. S11** Electrochemical simulation circuit diagram of the PU composite materials.

In the equivalent circuit model diagram,  $R_s$  represents solution resistance,  $R_c$  represent the resistance of coating, and  $Q_c$  is the capacitance of the coating.

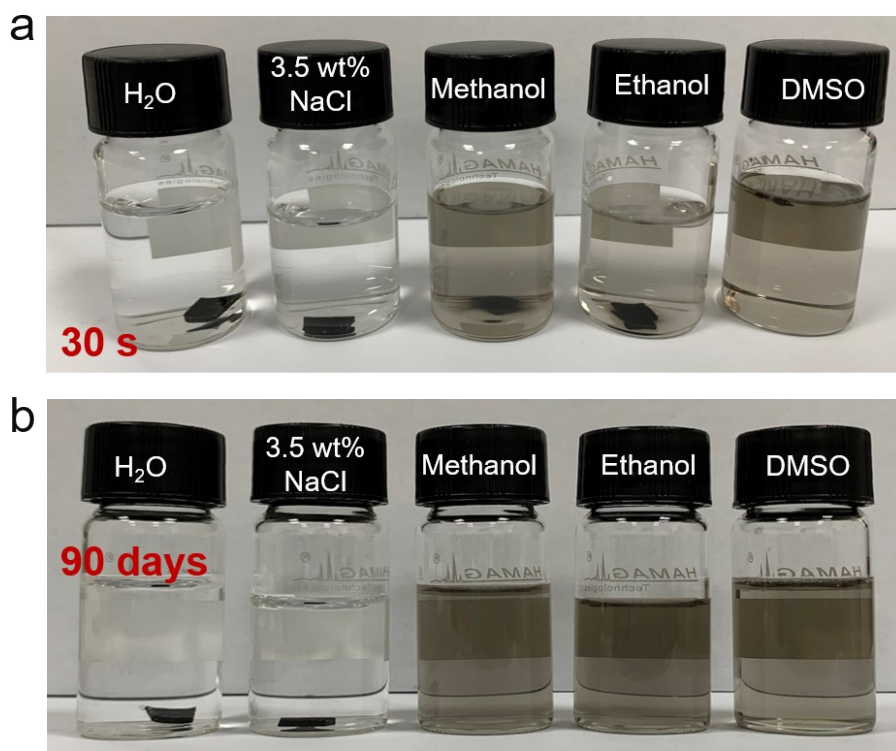

**Fig. S12** Optical photos of PU-PDG-0.5% immersed in different solvents for different time.



**Table S1** Comparison of elongation at break, ultimate tensile strength, Young's modulus, toughness, and self-healing efficiency of samples.

| Samples     | Elongation at break (%) | Ultimate tensile strength (MPa) | Young's modulus (MPa) | Toughness (MJ m <sup>-3</sup> ) | Self-healing efficiency (%) |
|-------------|-------------------------|---------------------------------|-----------------------|---------------------------------|-----------------------------|
| PU-UPy-AMPD | 612.3±11.4              | 6.6±0.1                         | 22.7±0.3              | 25.3±0.4                        | 90.7±2.4                    |
| PU-PDG-0.2% | 600.7±14.8              | 8.0±0.2                         | 20.24±0.5             | 29.5±0.6                        | 90.3±2.2                    |
| PU-PDG-0.5% | 596.2±8.2               | 10.3±0.5                        | 31.5±0.6              | 37.8±0.8                        | 89.3±1.8                    |
| PU-PDG-1.0% | 574.0±8.4               | 8.8±0.2                         | 46.5±0.8              | 31.1±0.7                        | 80.1±1.6                    |

**Table S2** Comparison of elongation at break, ultimate tensile strength, toughness, and self-healing efficiency of various self-healing polymers.

| Ref.      | Elongation at break (%) | Ultimate tensile strength (MPa) | Toughness (MJ m <sup>-3</sup> ) | Self-healing efficiency (%) | Self-healing conditions |
|-----------|-------------------------|---------------------------------|---------------------------------|-----------------------------|-------------------------|
| This work | 596                     | 10.4                            | 37.8                            | 89.1                        | RT. 1 h                 |
| 1         | 923                     | 6.8                             | 26.9                            | 76.6                        | RT. 2 h                 |
| 2         | 1700                    | 1.7                             | 15.3                            | 78.0                        | RT. 48 h                |
| 3         | 310                     | 1.1                             | 1.4                             | 76.0                        | RT. 48 h                |
| 4         | 1200                    | 0.6                             | 3.6                             | 93.0                        | NIR 1 min               |
| 5         | 560                     | 4.4                             | 12.0                            | 91.6                        | RT. 120 h               |
| 6         | 780                     | 1.9                             | 10.0                            | 80.0                        | RT. 24 h                |
| 7         | 600                     | 3.4                             | 8.0                             | 75.0                        | RT. 3 h                 |
| 8         | 310                     | 3.5                             | 6.8                             | 77.9                        | RT. 24 h                |
| 9         | 700                     | 2.1                             | 6.6                             | 76.2                        | RT. 24 h                |
| 10        | 58                      | 4.4                             | 1.4                             | 85.7                        | RT. 72 h                |
| 11        | 780                     | 1.9                             | 11.4                            | 87.6                        | RT. 6 h                 |

RT. stands for room temperature, NIR stands for near-infrared, self-healing efficiency =  $\sigma_{\text{healing}}/\sigma_{\text{original}}$ .

**Table S3** Comparison of elongation at break, ultimate tensile strength, Young's modulus, toughness, and self-healing efficiency of PU-PDG-0.5% under different healing time.

| Healing times<br>(min) | Elongation at<br>break (%) | Ultimate tensile<br>strength (MPa) | Young's modulus<br>(MPa) | Toughness<br>(MJ m <sup>-3</sup> ) | Self-healing<br>efficiency (%) |
|------------------------|----------------------------|------------------------------------|--------------------------|------------------------------------|--------------------------------|
| 5                      | 429.8±8.1                  | 3.3±0.6                            | 17.5±0.7                 | 8.5±0.7                            | 32.0±1.7                       |
| 15                     | 492.0±6.2                  | 6.0±0.4                            | 24.0±0.2                 | 18.3±0.4                           | 58.3±2.1                       |
| 30                     | 513.7±6.8                  | 6.7±0.5                            | 24.2±0.5                 | 22.8±0.6                           | 65.0±1.6                       |
| 45                     | 531.0±5.6                  | 8.1±0.3                            | 26.8±0.4                 | 28.1±0.9                           | 78.6±1.9                       |
| 60                     | 564.7±7.4                  | 9.2±0.5                            | 28.8±0.6                 | 33.5±0.8                           | 89.3±1.8                       |

**Table S4** Comparison of Log ( $Z_{f=0.01\text{Hz}}$ ) of different samples under different immersion time.

| Log ( $Z_{f=0.01\text{Hz}}/\text{ohm}$ ) | Immersion times (day) |           |           |           |           |
|------------------------------------------|-----------------------|-----------|-----------|-----------|-----------|
|                                          | 1                     | 10        | 30        | 50        | 70        |
| PU-UPy-AMPD                              | 8.16±0.24             | 8.06±0.19 | 8.12±0.23 | 7.50±0.16 | 7.14±0.11 |
| PU-PDG-0.2%                              | 8.46±0.22             | 8.42±0.24 | 8.28±0.22 | 8.40±0.28 | 8.25±0.25 |
| PU-PDG-0.5%                              | 8.83±0.52             | 8.75±0.45 | 8.70±0.49 | 8.64±0.29 | 8.67±0.23 |
| PU-PDG-1.0%                              | 8.86±0.78             | 8.77±0.46 | 8.67±0.61 | 8.62±0.44 | 8.57±0.28 |

**Table S5** Comparison of Log  $R_s$  of different samples under different immersion time.

| $R_s$ (ohm) | Immersion times (day)       |                             |                             |                             |                             |
|-------------|-----------------------------|-----------------------------|-----------------------------|-----------------------------|-----------------------------|
|             | 1                           | 10                          | 30                          | 50                          | 70                          |
| PU-UPy-AMPD | $1.37 \pm 0.58 \times 10^8$ | $1.09 \pm 0.46 \times 10^8$ | $1.31 \pm 0.53 \times 10^8$ | $3.00 \pm 1.64 \times 10^7$ | $1.38 \pm 0.83 \times 10^7$ |
| PU-PDG-0.2% | $2.82 \pm 0.49 \times 10^8$ | $2.63 \pm 0.54 \times 10^8$ | $1.86 \pm 0.48 \times 10^8$ | $2.48 \pm 0.62 \times 10^8$ | $1.77 \pm 0.59 \times 10^8$ |
| PU-PDG-0.5% | $6.76 \pm 1.12 \times 10^8$ | $5.62 \pm 0.86 \times 10^8$ | $5.01 \pm 1.02 \times 10^8$ | $4.36 \pm 0.66 \times 10^8$ | $4.67 \pm 0.54 \times 10^8$ |
| PU-PDG-1.0% | $7.24 \pm 1.54 \times 10^8$ | $5.88 \pm 0.99 \times 10^8$ | $4.67 \pm 1.25 \times 10^8$ | $4.16 \pm 0.91 \times 10^8$ | $3.27 \pm 0.68 \times 10^8$ |

## Supporting References

- [1] S. M. Kim, H. Jeon, S. H. Shin, S. A. Park, J. Jegal, S. Y. Hwang, D. X. Oh, J. Park, *Adv. Mater.* **2017**, *30*, 1705145.
- [2] J. Kang, D. Son, G. Wang, Y. Liu, J. Lopez, Y. Kim, J. Y. Oh, T. Katsumata, J. Mun, Y. Lee, *Adv. Mater.* **2018**, *30*, 1706846.
- [3] Y. L. Rao, A. Chortos, R. Pfattner, F. Lissel, Y. C. Chiu, V. Feig, J. Xu, T. Kurosawa, X. Gu, W. Chao, *J. Am. Chem. Soc.* **2016**, *138*, 6020.
- [4] P. Song, H. Qin, H. L. Gao, H. P. Cong, S. H. Yu, *Nat. Commun.* **2018**, *9*, 2786.
- [5] A. Susa, R. K. Bose, A. M. Grande, V. Sybrand, S. J. Garcia, *ACS Appl. Mater. Inter.* **2016**, *8*, 34068.
- [6] Y. Chen, A. M. Kushner, G. A. Williams, Z. Guan, *Nat. Chem.* **2012**, *4*, 467.
- [7] C. Philippe, T. Franois, S.-Z. Corinne, L. Ludwik, *Nature* **2008**, *451*, 977.
- [8] J. Li, H. Ejima, N. Yoshie, *ACS Appl. Mater. Inter.* **2016**, *8*, 19047.
- [9] H. Sardon, J. Zhu, L. Irusta, D. Mecerreyes, X. An, R. Hernandez, N. Aramburu, F. Ruipérez, J. M. Matxain, X. Pan, *Polym. Chem.* **2017**, 10.1039.C7PY00448F.
- [10] J. J. Cash, T. Kubo, A. P. Bapat, B. S. Sumerlin, *Macromolecules* **2015**, *48*, 2098.
- [11] Y. Yao, Z. Xu, B. Liu, M. Xiao, J. Yang, W. Liu, *Adv. Funct. Mater.* **2020**, 2006944.
